# Supplementary material for: Arabidopsis Chloroplast protein for Growth and Fertility1 (CGF1) and CGF2 are essential for chloroplast development and female gametogenesis
Source: PubMed Central journal article supplement (PMC7168881; doi:10.1186/s12870-020-02393-5), 2020-04-19
Supplement: 12870_2020_2393_MOESM1_ESM.pdf [file 12870_2020_2393_MOESM1_ESM.pdf]

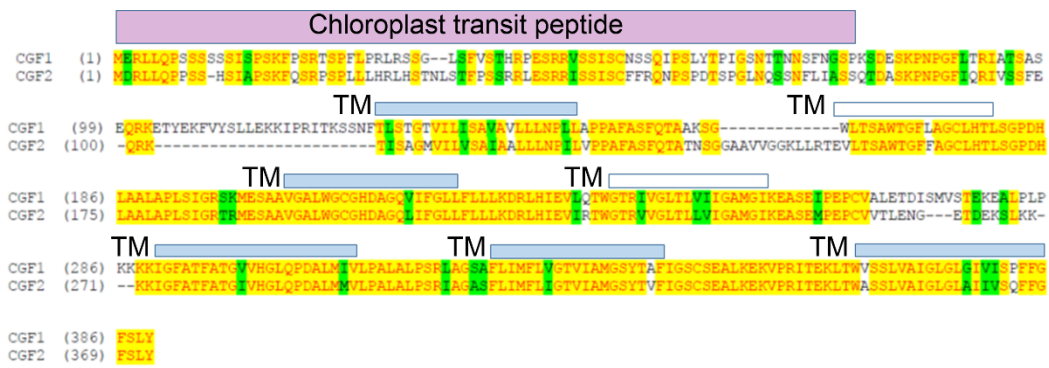

**Supplemental Figure 1.** CGF1 and CGF2 are homologous with multiple transmembrane domains predicted.

Sequence alignment was performed with VectorNTI. Yellow-highlighted amino acids are identical while green-highlighted amino acids are similar in side chains. Lilac box indicates predicted chloroplast transit peptide (TargetP). Blue boxes indicate TM domains shared by both proteins while empty boxes indicate TM domains only predicted in CGF1 (HMMTOP).

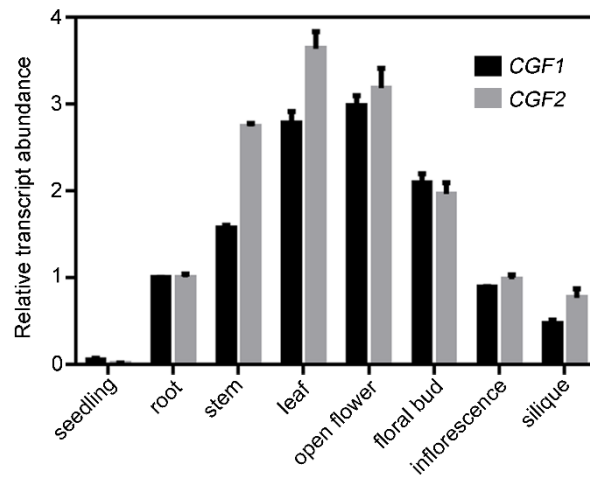

**Supplemental Figure 2.** *CGF1* and *CGF2* are expressed in diverse tissues and developmental stages.

Quantitative real-time PCRs (qPCRs) of *CGF1* and *CGF2* among different tissues. Results shown are means  $\pm$  standard errors (SEM, n=3). Each biological replicates were repeated three times with similar results.

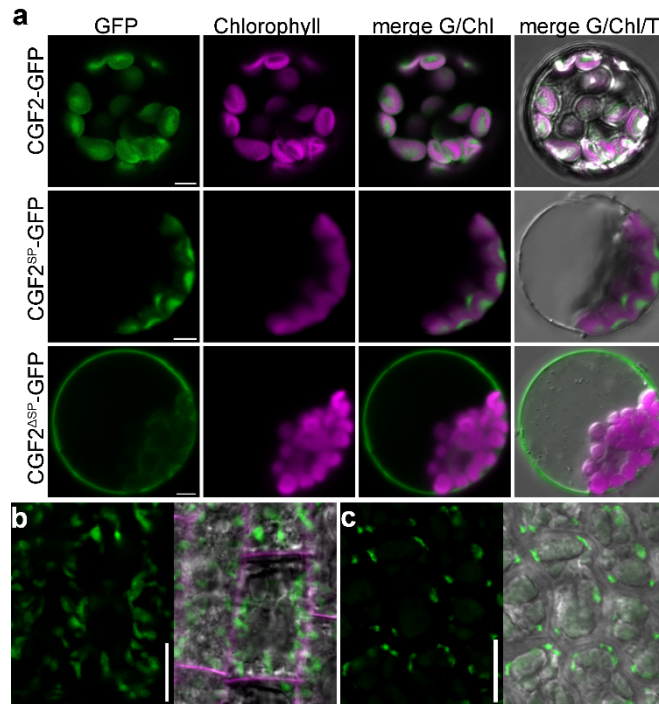

**Supplemental Figure 3.** CGF2 targets to chloroplasts through its N-terminal sequences. (a) CLSM of protoplasts from *ProUBQ10*:CGF2-GFP, *Pro35S*:CGF2<sup>SP</sup>-GFP, or *Pro35S*:CGF2<sup>ΔSP</sup>-GFP transgenic plants. From left to right: the GFP channel, autofluorescence channel (chlorophyll), merge of the GFP and autofluorescence (Chl) channels, merge of the GFP, autofluorescence, and transmission channels. (b) CLSM of root epidermal cells from *ProUBQ10*:CGF2-GFP. The right image is the merge of the GFP, RFP (FM4-64), and transmission channels. (c) CLSM of pavement cells from embryonic cotyledons of the *ProUBQ10*:CGF2-GFP transgenic plants. The right image is the merge of the GFP and transmission channels. Bars = 5 μm for (a); 10 μm for (b-c).

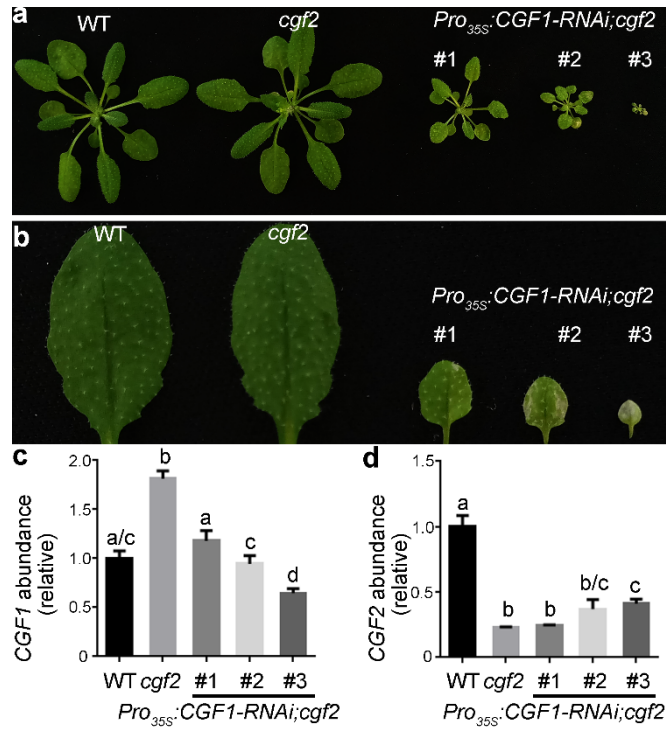

**Supplemental Figure 4.** Downregulating *CGF1* in *cgf2* mimicked defects of the double mutants.

(a-b) A representative 4 WAG plant (a) or the 6<sup>th</sup> true leaf (b) from 4 WAG wild-type, *cgf2*, or three lines of the *Pro*<sub>35S</sub>:*CGF1-RNAi*;*cgf2* transgenic plants. (c-d) Relative *CGF1* (c) or *CGF2* (d) transcript abundance by qPCRs. Results are means  $\pm$  SEM (n=3). Each biological replicates were repeated three times with similar results. Different letters indicate significant different groups (OneWay ANOVA, Tukey's multiple comparisons test, P<0.05).

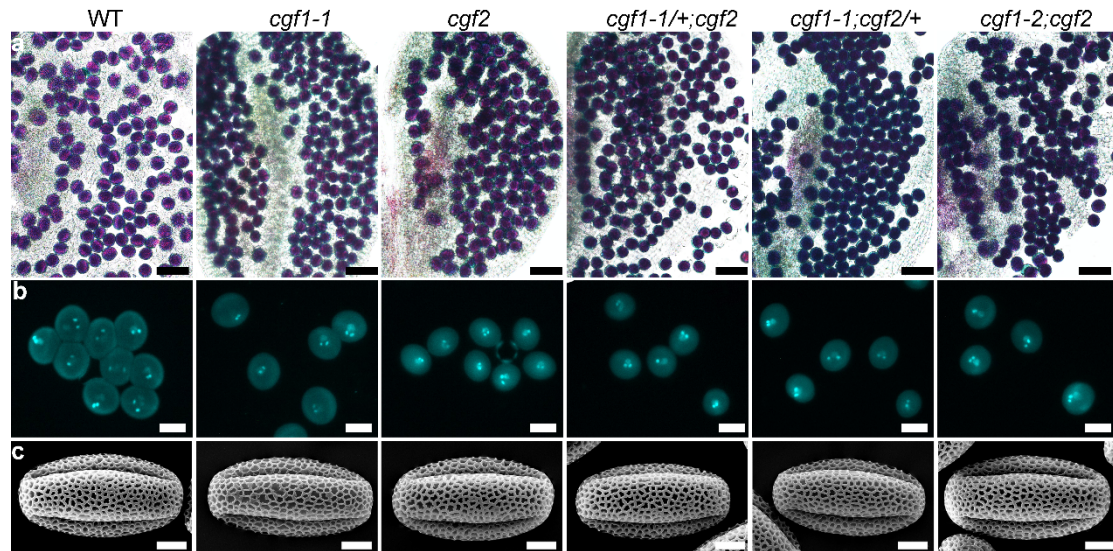

**Supplemental Figure 5.** Mutations of *CGF1* and *CGF2* did not affect pollen development.

(a-c) Alexander staining of a dehiscing anther (a), DAPI staining of mature pollen grains (b), or scanning electron micrographs (SEM, c) from wild-type, *cgf1-1*, *cgf1-2*, *cgf2*, *cgf1-1/+;cgf2*, *cgf1-1;cgf2/+*, or *cgf1-2;cgf2* plants. Bars = 50  $\mu\text{m}$  for (a); 20  $\mu\text{m}$  for (b); 5  $\mu\text{m}$  for (c).

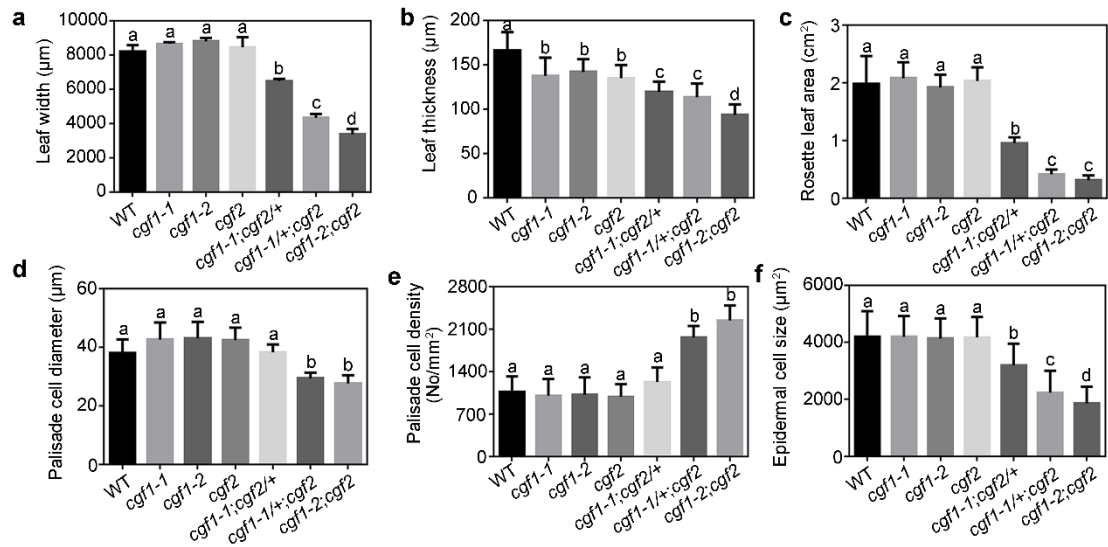

**Supplemental Figure 6.** Mutations of both *CGF1* and *CGF2* affected leaf development. (a-f) Quantification of leaf width (a), leaf thickness (b), rosette area (c), palisade cell diameter (d), palisade cell density (e), or pavement cell size (f) of the 4<sup>th</sup> true leaf from 3 WAG wild-type, *cgf1-1*, *cgf1-2*, *cgf2*, *cgf1-1/+;cgf2*, *cgf1-1;cgf2/+*, or *cgf1-2;cgf2* plants. Results are means  $\pm$  SE for (a) ( $n > 4$ ); for (d) and (e) ( $n > 3$ ). Results are means  $\pm$  SD for (b) ( $n > 75$ ); for (c) ( $n > 8$ ); for (f) ( $n > 65$ ). Different letters indicate significant different groups (OneWay ANOVA, Tukey's multiple comparisons test,  $P < 0.05$ ).

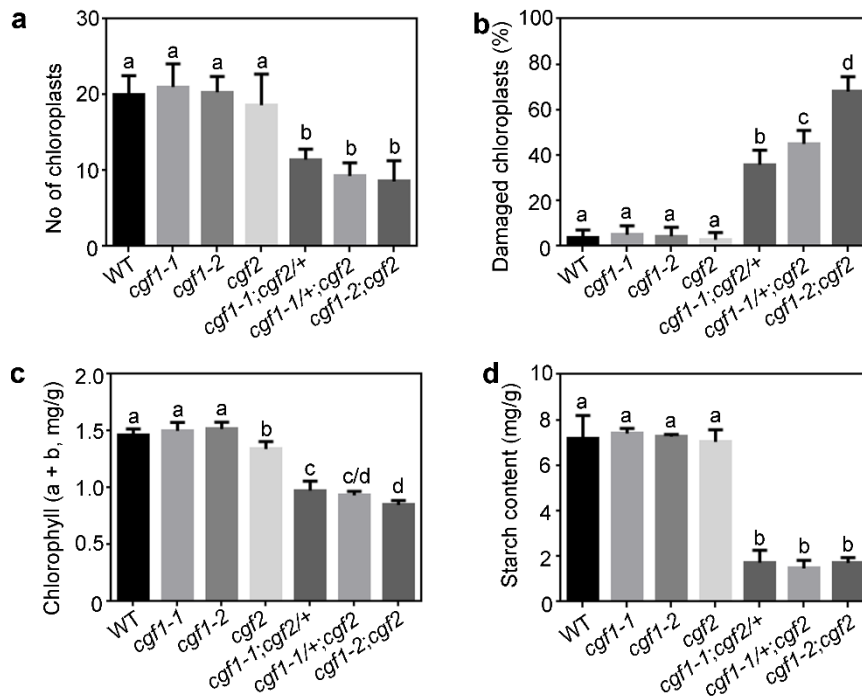

**Supplemental Figure 7.** Mutations of both *CGF1* and *CGF2* compromised chloroplast integrity.

(a-d) Number of chloroplasts per cross-section (a), the percentage of damaged chloroplasts among total chloroplasts (b), chlorophyll content (c), or starch content (d) of the 4<sup>th</sup> true leaf from 3 WAG wild-type, *cgf1-1*, *cgf1-2*, *cgf2*, *cgf1-1/+;cgf2*, *cgf1-1;cgf2/+*, or *cgf1-2;cgf2* plants. Results are means  $\pm$  SE ( $n > 7$ ). Different letters indicate significant different groups (OneWay ANOVA, Tukey's multiple comparisons test,  $P < 0.05$ ).

**Supplemental Table 1.** Segregation ratio.

| Parents       | Progenies                                 |                |                               |
|---------------|-------------------------------------------|----------------|-------------------------------|
| Female X Male | Genotype                                  | Expected ratio | Observed                      |
| AaBb X AaBb   | A(A/a)B(B/b): aaB(B/b):<br>A(B/b)bb: aabb | 9: 3: 3: 1     | 397: 101: 125: 0 <sup>a</sup> |
| Aabb X Aabb   | AAbb: Aabb: aabb                          | 1: 2: 1        | 68: 73: 0 <sup>b</sup>        |
| aaBb X aaBb   | aaBB: aaBb: aabb                          | 1: 2: 1        | 76: 89: 0 <sup>b</sup>        |

<sup>a</sup> Significantly different from 9: 3: 3: 1 ( $\chi^2$ ,  $P < 0.01$ ).

<sup>b</sup> Significantly different from 1: 2: 1 ( $\chi^2$ ,  $P < 0.01$ ).

A: *CGF1*; B: *CGF2*; a: *cgf1-1*; b: *cgf2*.



**Supplemental Table 2.** Oligos used in this study.

| Application | No.                         | 5'-3' sequences |                                           |
|-------------|-----------------------------|-----------------|-------------------------------------------|
| Cloning     | <i>CGF1g</i>                | ZP5837          | CACCGTGGGACTCACTGGATTGC                   |
|             |                             | ZP4998          | GTAGAGGCTAAAACCAAAGAAAGGG                 |
|             | <i>CGF2g</i>                | ZP5838          | CACCACTCTCCACAACACCACCAATG                |
|             |                             | ZP5739          | ATACAGGCTGAATCCAAAGAAC                    |
|             | <i>CGF2g-3'UTR</i>          | ZP5838          | CACCACTCTCCACAACACCACCAATG                |
|             |                             | ZP9022          | GAGCAAATCAACCCTTAAGAGAGGAAC               |
|             | <i>CGF1</i>                 | ZP4997          | CACCATGGAAAGGCTTCTTCAACCATC               |
|             |                             | ZP4998          | GTAGAGGCTAAAACCAAAGAAAGGG                 |
|             | <i>CGF1<sup>SP</sup></i>    | ZP4997          | CACCATGGAAAGGCTTCTTCAACCATC               |
|             |                             | ZP9786          | TTTGGGAGACCCATTGAAGGAATTG                 |
|             | <i>CGF2<sup>SP</sup></i>    | ZP5738          | CACCATGGATAGGCTTTTGCAACCTC                |
|             |                             | ZP9784          | AGAAGCAATCAAGAAATTACTACTCTG               |
|             | <i>CGF1<sup>ΔSP</sup></i>   | ZP9787          | CACCTCGGATGAATCGAAACCTAATCCC              |
|             |                             | ZP4998          | GTAGAGGCTAAAACCAAAGAAAGGG                 |
|             | <i>CGF2<sup>ΔSP</sup></i>   | ZP9785          | CACCTCTCAAACCGATGCGTCGAAAC                |
|             |                             | ZP5739          | ATACAGGCTGAATCCAAAGAAC                    |
|             | <i>CGF1&amp;CGF2-CRISPR</i> | ZP5839          | ATATATGGTCTCGATTGAACTGCAGCTAAATCCGGTGTT   |
|             |                             | ZP5840          | TGAACTGCAGCTAAATCCGGTGTTTTAGAGCTAGAAATAGC |
|             |                             | ZP5841          | AACCAGGACTGAAGTATTGACACAATCTTAGTCGACTCTAC |
|             |                             | ZP5842          | ATTATTGGTCTCGAAACCAGGACTGAAGTATTGACACAA   |
| qPCR        | <i>CGF1</i>                 | ZP9333          | CGTCACTGTATACGCCTATAGG                    |
|             |                             | ZP9334          | AATCCGGGATTAGGTTTCGATT                    |
|             | <i>CGF2</i>                 | ZP5013          | GCTTCTTCTCAAACCGATGCG                     |
|             |                             | ZP5014          | GAAAGCTAGCGAAAGCAGGC                      |
|             | <i>GAPDH</i>                | ZP687           | TGAAATCAAAAAGCTATCAAGG                    |
|             |                             | ZP688           | CATCATCCTCGGTGTATCCAA                     |
